# Supplementary material for: Alternative Tobacco Product Use in Critically Ill Patients
Source: Int J Environ Res Public Health. 2020 Nov 24;17(23):8707. doi: 10.3390/ijerph17238707 (PMC7727672; doi:10.3390/ijerph17238707)
Supplement: Supplementary file 1 [file ijerph-17-08707-s001.pdf]

# Supplement

# Supplemental Figure S1. Alcohol and Cigarette Use Questionnaire

CRF Version 2.13

Data Collection Sheet for ICU Cohort Study

| Cigarette and Alcohol Questionnaire                                                                                                                                                                                                  |                                                 |                                                 |                                           |
|--------------------------------------------------------------------------------------------------------------------------------------------------------------------------------------------------------------------------------------|-------------------------------------------------|-------------------------------------------------|-------------------------------------------|
| Study ID#: _____                                                                                                                                                                                                                     | Collected by: _____                             | Time: ____ : ____                               | Date: ____ / ____ / ____                  |
| Respondent:                                                                                                                                                                                                                          | <input type="checkbox"/> Patient                | <input type="checkbox"/> Surrogate              |                                           |
| Patient's Gender:                                                                                                                                                                                                                    | <input type="checkbox"/> Male                   | <input type="checkbox"/> Female                 | <input type="checkbox"/> Transgender      |
| Is the Patient Hispanic?                                                                                                                                                                                                             | <input type="checkbox"/> Yes                    | <input type="checkbox"/> No                     |                                           |
| Patient's Race/Ethnicity:                                                                                                                                                                                                            | <input type="checkbox"/> Caucasian/White        | <input type="checkbox"/> African American/Black | <input type="checkbox"/> Pacific Islander |
|                                                                                                                                                                                                                                      | <input type="checkbox"/> Asian                  | <input type="checkbox"/> Native American        | <input type="checkbox"/> Mixed Race       |
|                                                                                                                                                                                                                                      |                                                 |                                                 | <input type="checkbox"/> Unknown          |
|                                                                                                                                                                                                                                      |                                                 |                                                 | <input type="checkbox"/> Other _____      |
| <b>Cigarette Smoking</b>                                                                                                                                                                                                             |                                                 |                                                 |                                           |
| 1. Has the patient smoked more than 100 cigarettes in his/her lifetime?<br>(If no, skip to 5)                                                                                                                                        | Yes                                             | No                                              | Unsure                                    |
| 2. If yes, how many pack-years?<br># of packs per day _____ * # of years smoked _____ = _____ pack-years                                                                                                                             | <input type="checkbox"/>                        | <input type="checkbox"/>                        | <input type="checkbox"/>                  |
| 3. Is patient currently a smoker?                                                                                                                                                                                                    | <input type="checkbox"/>                        | <input type="checkbox"/>                        | <input type="checkbox"/>                  |
| a. If yes, how many cigarettes/day?                                                                                                                                                                                                  | _____ cigarettes/day                            |                                                 |                                           |
| 4. If the patient is a former smoker, when did s/he quit smoking?                                                                                                                                                                    | _____ quit date                                 |                                                 |                                           |
| 5. Does the patient use smokeless tobacco products? (chew, snuff)                                                                                                                                                                    | <input type="checkbox"/>                        | <input type="checkbox"/>                        | <input type="checkbox"/>                  |
| 6. Does the patient smoke other tobacco products?<br>(If no, skip to 7)                                                                                                                                                              | <input type="checkbox"/>                        | <input type="checkbox"/>                        | <input type="checkbox"/>                  |
| a. <input type="checkbox"/> Cigars <input type="checkbox"/> Little Cigars <input type="checkbox"/> Cigarillos <input type="checkbox"/> Pipe <input type="checkbox"/> Hookah <input type="checkbox"/> Other _____                     |                                                 |                                                 |                                           |
| 7. Does the patient use electronic cigarettes? (aka "vaping")                                                                                                                                                                        | <input type="checkbox"/>                        | <input type="checkbox"/>                        | <input type="checkbox"/>                  |
| <b>Alcohol Use Disorder Identification Test: Interview Version</b>                                                                                                                                                                   |                                                 |                                                 |                                           |
| 1. How often do you have a drink containing alcohol?<br>(0) Never<br>(1) Monthly or less<br>(2) 2 to 4 times a month<br>(3) 2 to 3 times a week<br>(4) 4 or more times a week                                                        | Skip to Q 9 & 10 if Q 1 = 0                     | <input type="text"/>                            |                                           |
| 2. How many drinks containing alcohol do you have on a typical day when you are drinking?<br>(0) 1 or 2<br>(1) 3 or 4<br>(2) 5 or 6<br>(3) 7, 8, or 9<br>(4) 10 or more                                                              |                                                 | <input type="text"/>                            |                                           |
| 3. How often do you have six or more drinks on one occasion?<br>(0) Never<br>(1) Less than monthly<br>(2) Monthly<br>(3) Weekly<br>(4) Daily or almost daily                                                                         | Skip to Q 9 & 10 if total score for Q 2 & 3 = 0 | <input type="text"/>                            |                                           |
| 4. How often during the last year have you found that you were not able to stop drinking once you had started?<br>(0) Never<br>(1) Less than monthly<br>(2) Monthly<br>(3) Weekly<br>(4) Daily or almost daily                       |                                                 | <input type="text"/>                            |                                           |
| 5. How often during the last year have you failed to do what was normally expected from you because of drinking?<br>(0) Never<br>(1) Less than monthly<br>(2) Monthly<br>(3) Weekly<br>(4) Daily or almost daily                     |                                                 | <input type="text"/>                            |                                           |
| 6. How often during the last year have you needed a first drink in the morning to get yourself going after a heavy drinking session?<br>(0) Never<br>(1) Less than monthly<br>(2) Monthly<br>(3) Weekly<br>(4) Daily or almost daily |                                                 | <input type="text"/>                            |                                           |
| 7. How often during the last year have you had a feeling of guilt or remorse after drinking?<br>(0) Never<br>(1) Less than monthly<br>(2) Monthly<br>(3) Weekly<br>(4) Daily or almost daily                                         |                                                 | <input type="text"/>                            |                                           |
| 8. How often during the last year have you been unable to remember what happened the night before because you had been drinking?<br>(0) Never<br>(1) Less than monthly<br>(2) Monthly<br>(3) Weekly<br>(4) Daily or almost daily     |                                                 | <input type="text"/>                            |                                           |
| 9. Have you or someone else been injured as a result of your drinking?<br>(0) No<br>(2) Yes, but not in the last year<br>(4) Yes, during the last year                                                                               |                                                 | <input type="text"/>                            |                                           |
| 10. Has a relative or friend or a doctor or another health worker been concerned about your drinking or suggested you cut down?<br>(0) No<br>(2) Yes, but not in the last year<br>(4) Yes, during the last year                      |                                                 | <input type="text"/>                            |                                           |
| Record total of specific items here                                                                                                                                                                                                  |                                                 |                                                 | <input type="text"/>                      |

**Supplemental Figure S2.** Flow Diagram of Enrollment

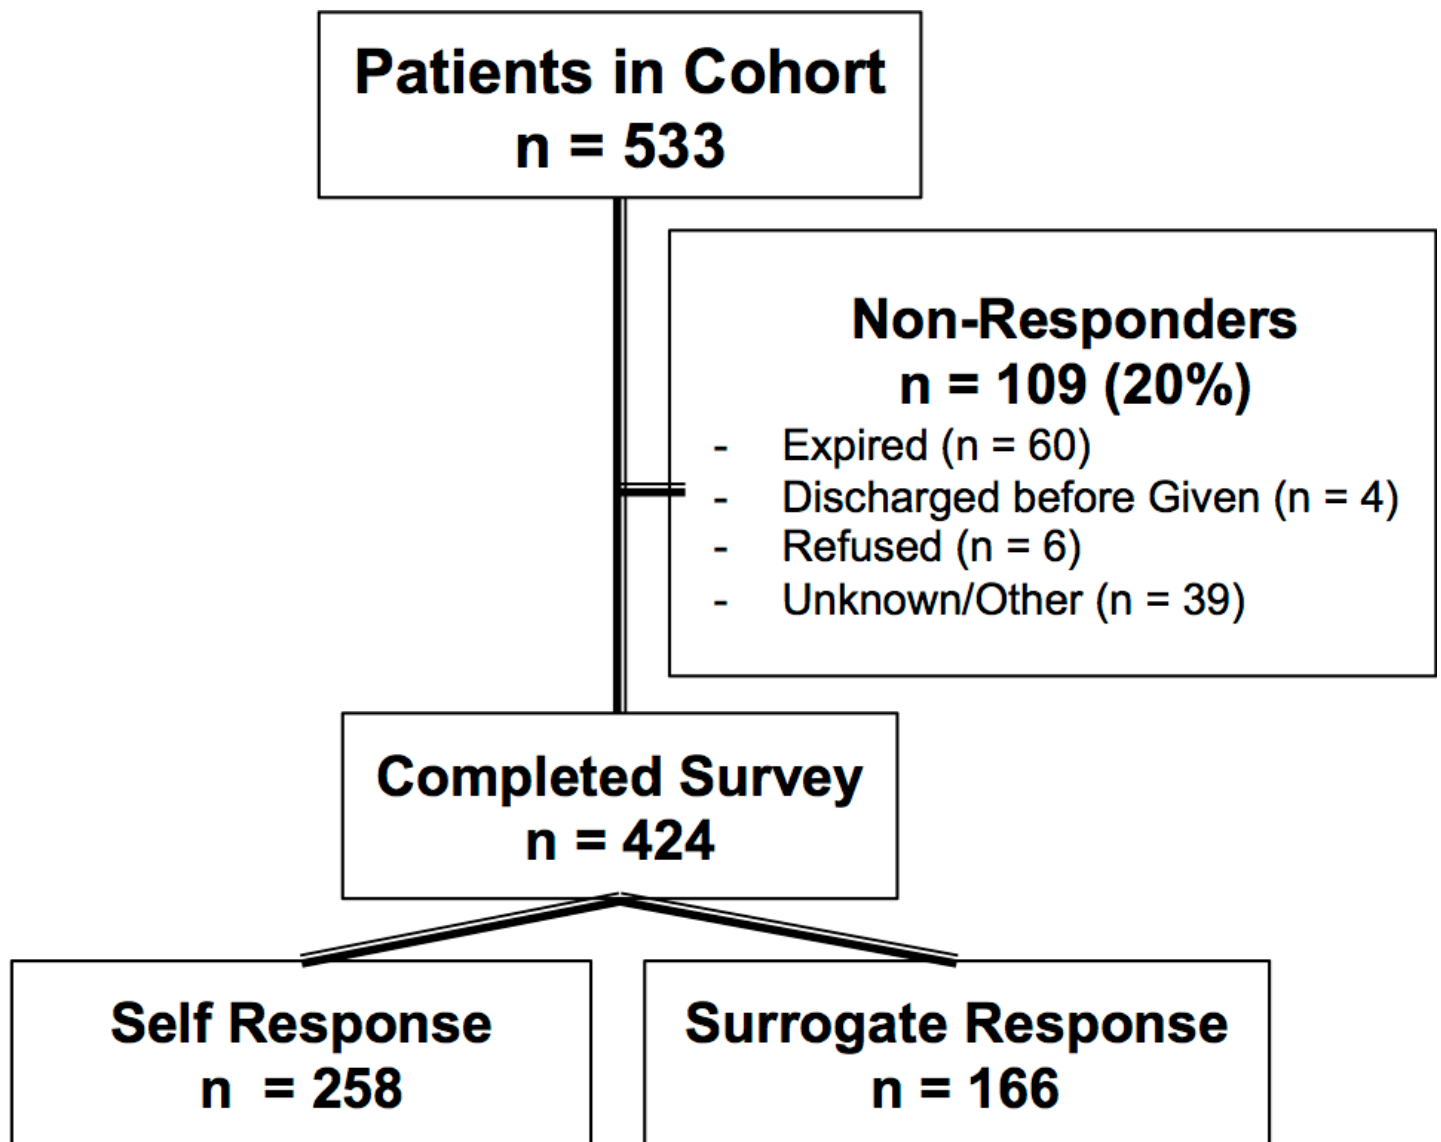

**Supplemental Table S1.** Demographic Characteristics and Clinical Outcomes, Survey Responders vs. Non-Responders.<sup>^</sup>

| Variable                        | Survey Responder<br>(n = 425) | Survey<br>Non-Responder<br>(n = 108) | p-value |
|---------------------------------|-------------------------------|--------------------------------------|---------|
| Hospital A vs. Hospital B       |                               |                                      | 0.37    |
| Hospital A                      | 368 (87)                      | 97 (90)                              |         |
| Hospital B                      | 57 (13)                       | 11 (10)                              |         |
| Admitted to Floor or ICU        |                               |                                      | <0.001* |
| Hospital Floor                  | 109 (26)                      | 10 (9)                               |         |
| Hospital ICU                    | 316 (74)                      | 98 (91)                              |         |
| Age, mean ± SD                  | 65 ± 16                       | 69 ± 15                              | 0.01*   |
| Male                            | 240 (56)                      | 58 (54)                              | 0.74    |
| Race                            |                               |                                      | 0.94    |
| African American                | 59 (14)                       | 17 (16)                              |         |
| Asian                           | 113 (27)                      | 30 (28)                              |         |
| Caucasian                       | 195 (46)                      | 47 (44)                              |         |
| Other                           | 58 (14)                       | 14 (13)                              |         |
| Hispanic                        | 51 (12)                       | 13 (12)                              | 0.97    |
| Insurance                       |                               |                                      | 0.46    |
| Medicaid                        | 88 (21)                       | 26 (23)                              |         |
| Medicare                        | 213 (50)                      | 59 (55)                              |         |
| Private Insurance               | 113 (27)                      | 21 (19)                              |         |
| None                            | 7 (2)                         | 3 (3)                                |         |
| Other                           | 3 (1)                         | 0 (0)                                |         |
| In-hospital Mortality           | 58 (14)                       | 77 (71)                              | <0.001* |
| APACHEIII, mean ± SD            | 76 ± 35                       | 116 ± 46                             | <0.001* |
| Primary Diagnosis (most common) |                               |                                      |         |
| 1:                              | Sepsis<br>120 (22)            | Sepsis<br>25 (23)                    |         |
| 2:                              | Pneumonia<br>94 (18)          | Cardiac Arrest<br>20 (18)            |         |
| 3:                              | Cardiac Arrest<br>33 (6)      | Respiratory Failure<br>9 (8)         |         |
| 4:                              | UTI<br>23 (4)                 | Pneumonia<br>5 (5)                   |         |

<sup>^</sup> = all values are listed as n (%) unless otherwise specified

\* Note: Categorical data were analyzed by Pearson's chi-squared test or Fischer exact test. Continuous variables were compared using Student's t-test. For non-normally distributed values, Mann-Whitney U test was used. Statistical significance was defined as  $p \leq .05$ , using a two-tailed test of hypothesis.

The most common diagnoses included sepsis, pneumonia, and cardiac arrest (**Supplemental Table 1**).

**Supplemental Table S2. Demographic Characteristics, Self vs. Surrogate Responders**

| Variable                             | Self-Responder<br>(n = 259) | Surrogate-Responder<br>(n = 166) | p-value |
|--------------------------------------|-----------------------------|----------------------------------|---------|
| Hospital A vs. Hospital B            |                             |                                  | 0.19    |
| Hospital A                           | 229 (88)                    | 141 (85)                         |         |
| Hospital B                           | 30 (12)                     | 25 (15)                          |         |
| Admitted to Floor or ICU             |                             |                                  | 0.051   |
| Hospital Floor                       | 75 (30)                     | 34 (22)                          |         |
| Hospital ICU                         | 184 (70)                    | 132 (78)                         |         |
| Age, median $\pm$ SD                 | 61 $\pm$ 15                 | 70 $\pm$ 15                      | <0.001* |
| Male                                 | 161 (62)                    | 79 (48)                          | 0.003*  |
| Race                                 |                             |                                  | 0.001*  |
| African American                     | 40 (15)                     | 19 (11)                          |         |
| Asian                                | 48 (19)                     | 65 (39)                          |         |
| Caucasian                            | 135 (52)                    | 60 (36)                          |         |
| Other                                | 36 (14)                     | 22 (14)                          |         |
| Hispanic                             | 32 (12)                     | 19 (11)                          | 0.88    |
| From Skilled Nursing Facility/Home   | 32 (12)                     | 29 (17)                          | 0.54    |
| Cigarette Smoking History (Chart)    |                             |                                  | 0.008*  |
| Current Smoker                       | 49 (19)                     | 12 (7)                           |         |
| Former Smoker                        | 88 (34)                     | 58 (34)                          |         |
| Never Smoker                         | 118 (45)                    | 85 (51)                          |         |
| Unknown                              | 7 (3)                       | 13 (8)                           |         |
| Cigarette Smoking History (Survey)** |                             |                                  | 0.06    |
| Current Smoker                       | 43 (16)                     | 15 (9)                           |         |
| Former Smoker                        | 92 (36)                     | 67 (40)                          |         |
| Never Smoker                         | 123 (48)                    | 84 (51)                          |         |

^ = all values are listed as n (%) unless otherwise specified

\* Note: Categorical data were analyzed by Pearson's chi-squared test or Fischer exact test. Continuous variables were compared using Student's t-test. For non-normally distributed values, Mann-Whitney U test was used. Statistical significance was defined as  $p \leq .05$ , using a two-tailed test of hypothesis.

\*\* - Smoking status for 1 survey respondent was unknown

**Supplemental Table S3.** Surrogate and Self-Respondents Show Agreement with Medical Record on Cigarette Smoking History

| Variable       | Patient-Responder |               |            | Surrogate-Responder |               |            |
|----------------|-------------------|---------------|------------|---------------------|---------------|------------|
|                | Current Smoker    | Former Smoker | Non Smoker | Current Smoker      | Former Smoker | Non Smoker |
| Chart Review   |                   |               |            |                     |               |            |
| Current Smoker | 35                | 11            | 2          | 10                  | 1             | 1          |
| Former Smoker  | 5                 | 72            | 9          | 2                   | 49            | 6          |
| Non Smoker     | 0                 | 7             | 110        | 2                   | 10            | 72         |

Surrogate agreement = 85.6%; Cohen's k = 0.75;  
Patient agreement = 86.1%; Cohen's k = 0.814;

**Supplemental Table S4.** Characteristics of Self Responders, ATP Users vs. Cigarette Smokers.^

| Variable                           | ATP User<br>(n = 44) | Cigarette Smoking<br>Only<br>(n = 25) | Non-ATP or<br>Cigarette User<br>(n = 188) | p-value |
|------------------------------------|----------------------|---------------------------------------|-------------------------------------------|---------|
| Hospital A vs. Hospital B          |                      |                                       |                                           | 0.13    |
| Hospital A                         | 35 (80)              | 23 (92)                               | 171 (90)                                  |         |
| Hospital B                         | 9 (20)               | 2 (8)                                 | 19 (10)                                   |         |
| Enrolled to Hospital Floor or ICU  |                      |                                       |                                           | 0.44    |
| Hospital Floor                     | 10 (23)              | 6 (24)                                | 59 (32)                                   |         |
| ICU                                | 34 (77)              | 19 (76)                               | 124 (68)                                  |         |
| Age, mean $\pm$ SD                 | 57 $\pm$ 17          | 58 $\pm$ 13                           | 62 $\pm$ 14                               | 0.07    |
| Male                               | 36 (82)              | 15 (60)                               | 110 (58)                                  | 0.01*   |
| Race                               |                      |                                       |                                           | 0.03*   |
| African American                   | 7 (16)               | 9 (36)                                | 24 (13)                                   |         |
| Asian                              | 2 (5)                | 2 (8)                                 | 44 (23)                                   |         |
| Caucasian                          | 28 (64)              | 12 (48)                               | 95 (50)                                   |         |
| Other                              | 7 (15)               | 2 (8)                                 | 27 (14)                                   |         |
| Insurance                          |                      |                                       |                                           | 0.29    |
| Medicaid                           | 12 (27)              | 10 (40)                               | 41 (22)                                   |         |
| Medicare                           | 24 (55)              | 11 (44)                               | 88 (46)                                   |         |
| Private Insurance                  | 6 (14)               | 4 (16)                                | 56 (29)                                   |         |
| None                               | 1 (2)                | 0 (0)                                 | 3 (2)                                     |         |
| Other                              | 1 (2)                | 0 (0)                                 | 2 (1)                                     |         |
| Cigarette Smoking History (Survey) |                      |                                       |                                           |         |
| Current Cigarette Smoker           | 18 (41)              | -                                     | -                                         |         |
| Former Cigarette Smoker            | 19 (43)              | -                                     | 73 (34)                                   |         |
| Never Cigarette Smoker             | 7 (16)               | -                                     | 116 (54)                                  |         |
| Alcohol Use                        | 22 (51)              | 9 (36)                                | 46 (25)                                   | 0.02*   |
| Alcohol Abuse                      | 7 (16)               | 3 (12)                                | 6 (3)                                     | 0.002*  |
| Clinical Outcomes, ICU Patients    |                      |                                       |                                           |         |
| In-hospital Mortality              | 1 (3)                | 1 (5)                                 | 13 (10)                                   | 0.37    |
| APACHEIII, mean $\pm$ SD           | 77 $\pm$ 29          | 74 $\pm$ 26                           | 76 $\pm$ 29                               | 0.79    |
| Clinical Outcomes, Floor Patients  |                      |                                       |                                           |         |
| In-hospital Mortality              | 1 (10)               | 0 (0)                                 | 3 (5)                                     | 0.67    |
| APACHEIII, mean $\pm$ SD           | 39 $\pm$ 19          | 39 $\pm$ 14                           | 48 $\pm$ 25                               | 0.42    |

^ = all values are listed as n (%) unless otherwise specified

\* Note: Categorical data were analyzed by Pearson's chi-squared test or Fischer exact test. Continuous variables were compared using Student's t-test. For non-normally distributed values, Mann-Whitney U test was used. Statistical significance was defined as p  $\leq$  .05, using a two-tailed test of hypothesis.

\*\* - Smoking status for 1 survey respondent was unknown

## **Main Article**

Table 1. Demographic Characteristics of the Cohort. Data are presented as mean  $\pm$  SD or n (%) unless otherwise indicated.

Figure 1. Prevalence of Alternative Tobacco Use. ATP: Alternative Tobacco Product.

Table 2. Demographic Characteristics of Self Responders, ATP Users vs. Non-Users.

Table 3. Patient vs. Surrogate Reports of Alternative Tobacco Product Usage.

Table 4. Analysis of PATH, NHIS, and TPPPS Cohort Data.

## **Supplement**

Supplemental Figure S1. Alcohol and Cigarette Use Questionnaire.

Supplemental Figure S2. Flow Diagram of Enrollment.

Supplemental Table S1. Demographic Characteristics and Clinical Outcomes, Survey Responders vs. Non- Responders. APACHE: Acute Physiology and Chronic Health Evaluation.

Supplemental Table S2. Demographic Characteristics, Self vs. Surrogate Responders

Supplemental Table S3. Surrogate and Self Responders Show Agreement with Medical Record on Cigarette Smoking History.

Supplemental Table S4. Characteristics of Self Responders, ATP Users vs. Cigarette Smokers.
